# Supplementary material for: Pituitary Adenylate Cyclase-Activating Polypeptide (PACAP) Promotes Regeneration of Corneal Epithelial Cells via the NR4A1 Signaling Pathway
Source: Research Square preprint supplement (doi:10.21203/rs.3.rs-7055400/v1), 2025-07-09

**SUPPLEMENTARY INFORMATION**

**Supplemental Fig. 1.** Effect of PACAP eye drops on tear secretion in lacrimal gland-removed mice.


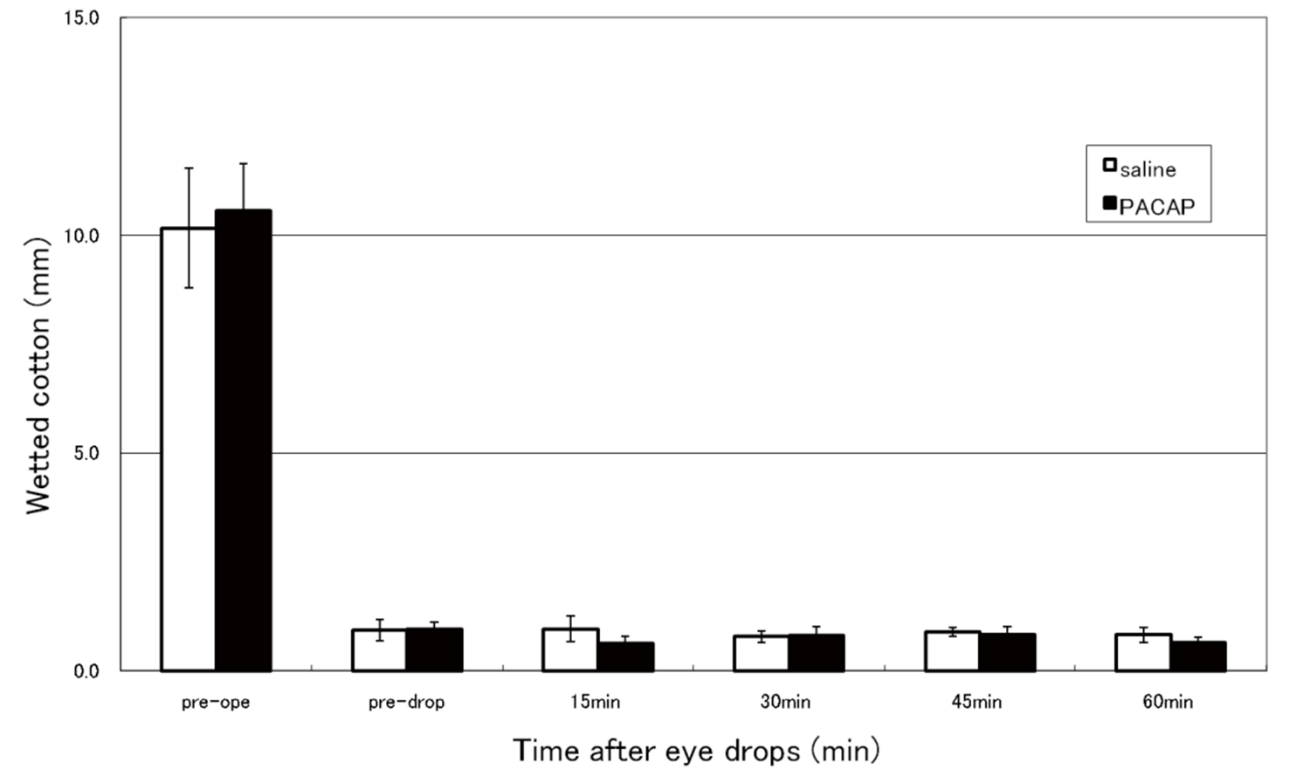


**Supplemental Fig. 2.** In vitro scratch injury on cultured monolayer of SV40-human corneal epithelium cell line. Typical images of injury site (A) and graph of injury area (B) at 6 h timepoint following PACAP treatment.


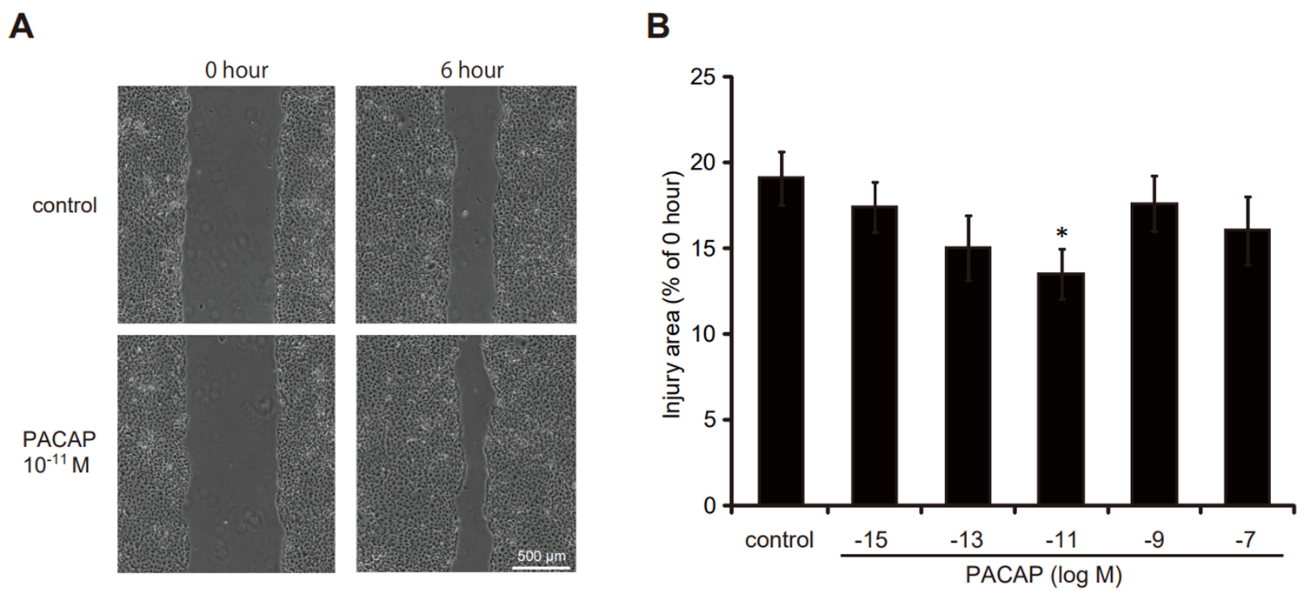


**Supplemental Fig. 3.** Number of genes in the HCEC2 cell scratch assay showing variable expression by DNA microarray analysis. The number of genes that changed in the 3 hours after PACAP addition was 336 (up-regulated) and 209 (down-regulated) genes in the PACAP group, compared to 114 (up-regulated) and 337 (down-regulated) genes in the PACAP + scratch group. Eighteen hours after PACAP addition, there was 117 (up-regulated) and 681 (down-regulated) genes in the PACAP group, compared to 173 (up-regulated) and 352 (down-regulated) genes in the PACAP + scratch group.


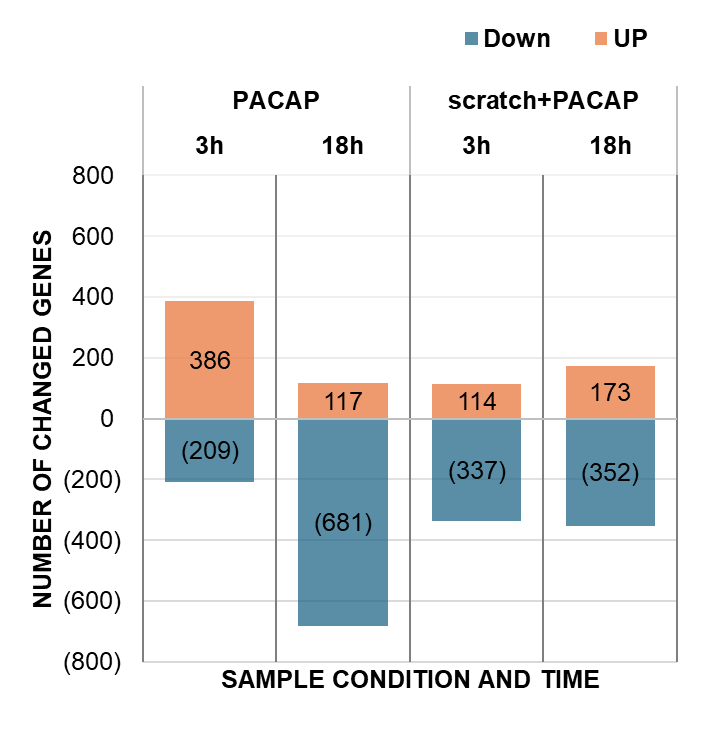

Supplement: Supplementary file 1 [file 3bb717d75da189bddaf2d80e.docx]
